# Supplementary material for: Anti-Inflammatory Activity and Structure-Activity Relationships of Brominated Indoles from a Marine Mollusc
Source: MDPI journal article supplement (doi:10.3390/md15050133), 2017-05-06
Supplement: s1 [file s1]

Supplementary Materials: The following are available online at [www.mdpi.com/link](http://www.mdpi.com/link)

# Anti-Inflammatory Activity and Structure- Activity Relationships of Brominated Indoles from a Marine Mollusc

Tarek B. Ahmad<sup>1,2</sup>, David Rudd<sup>1</sup>, Joshua Smith<sup>1,3</sup>, Michael Kotiw<sup>2</sup>, Peter Mouatt<sup>3</sup>, Lisa M. Seymour<sup>2</sup>, Lei Liu<sup>3</sup>, Kirsten Benkendorff<sup>1\*</sup>

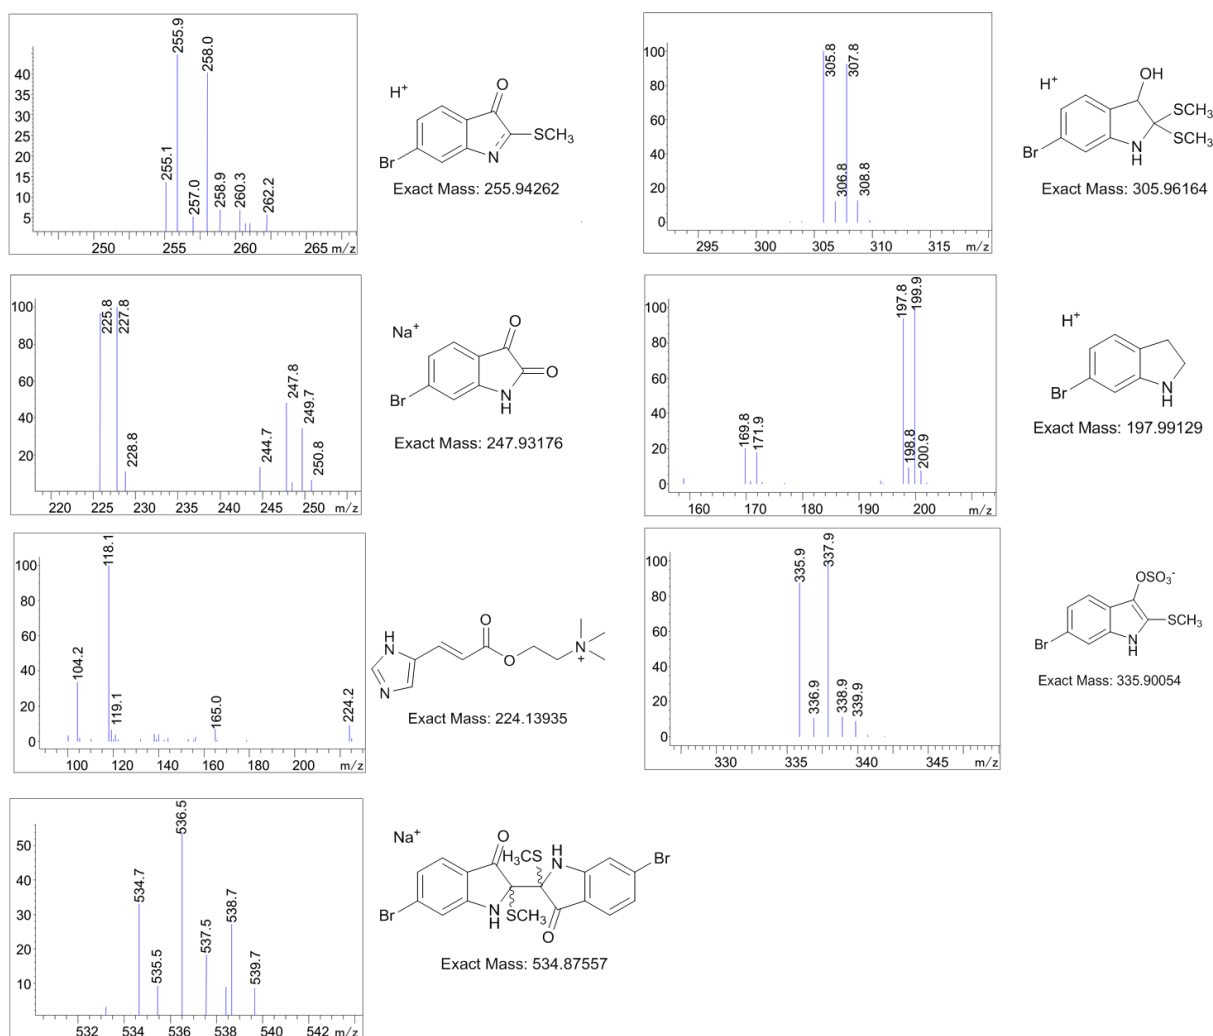

**Figure S1:** Mass spectral fragmentation patterns of the brominated indoles detected by LC/MS in an extract from the hypobranchial glands of *Dicathais orbita*.

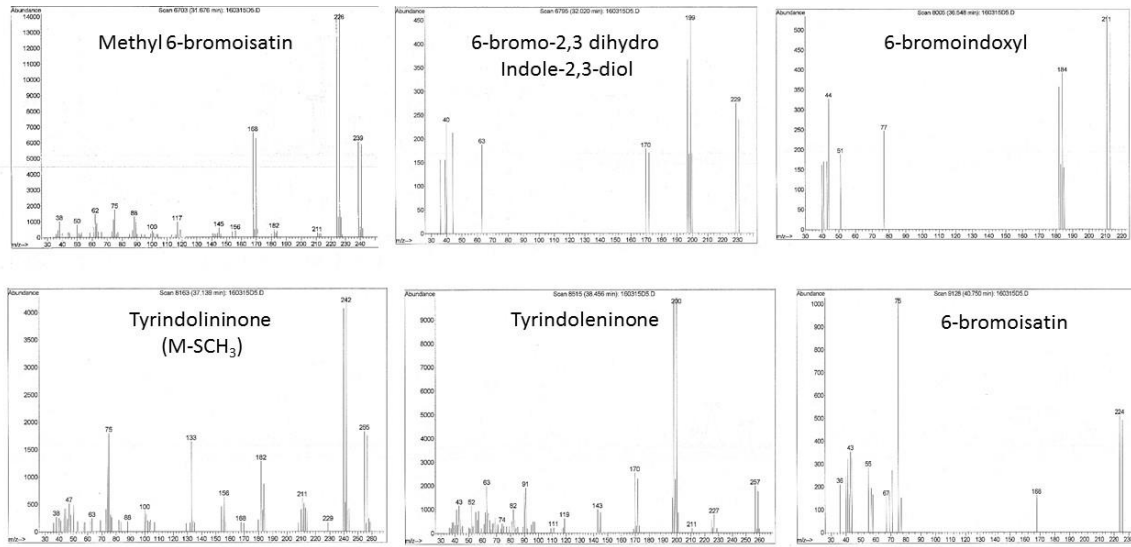

**Figure S2:** Mass spectral fragmentation patterns of the brominated indoles detected by GC/MS in an extract from the hypobranchial glands of *Dicathais orbita*.
